# Supplementary material for: In situ studies into the characterisation and degradation of blue ballpoint inks by diffuse reflectance visible spectroscopy
Source: Royal Society of Chemistry journal article supplement (doi:10.1039/c5ay00761e), 2015-01-01

## In-situ studies into the characterisation and degradation of blue ballpoint inks by diffuse reflectance visible spectroscopy

Georgina Sauzier,<sup>a</sup> Peter Giles,<sup>a</sup> Simon W. Lewis<sup>a</sup> and Wilhelm van Bronswijk<sup>a</sup>

<sup>a</sup> Department of Chemistry, Curtin University, GPO Box U1987, Perth, Western Australia 6845, Australia. E-mail: S.Lewis@curtin.edu.au; Tel: +61 8 9266 2484

### Supporting Information

**Table S1:** Blue ballpoint pens utilised in study

| Pen No. | Pen Type                          | Pen No. | Pen Type                          |
|---------|-----------------------------------|---------|-----------------------------------|
| 1*      | Bic Cristal M                     | 19      | Pilot G-2 05                      |
| 2       | Papermate Ink Joy 100             | 20      | Pilot Super Grip                  |
| 3       | Artline Ikonik                    | 21*     | Uniball Power Tank                |
| 4       | Deer Ultrafine                    | 22*     | Pilot BPS-GP                      |
| 5       | Artline 7210                      | 23      | PaperMate Profile                 |
| 6       | PaperMate Kilometrico             | 24*     | Bic Pro Plus                      |
| 7       | Bic ReAction                      | 25*     | PaperMate Flexgrip Elite          |
| 8       | Celco Retractable                 | 26*     | Pentel Rolly                      |
| 9       | Bic Orange Fine                   | 27      | PaperMate Kilometrico Elite       |
| 10      | Keji Ballpoint                    | 28*     | Staedtler Triplus 426             |
| 11*     | Office Basics Ballpoint           | 29      | Staedtler Stick Click Retractable |
| 12      | Artline Smoove                    | 30      | Pilot BP-145                      |
| 13*     | J.Burrows Ballpoint               | 31      | PaperMate Flexgrip Ultra          |
| 14      | Bic Round Stic                    | 32*     | PaperMate Ink Joy 300             |
| 15      | Artline Flow 4-Colour Retractable | 33*     | Office Choice Retractable         |
| 16      | Artline Clix 4-Colour             | 34      | Cos Capped Ballpoint              |
| 17      | Bic Cristal M Easy Glide          | 35      | Staedtler 430                     |
| 18*     | Bic Economy                       |         |                                   |

Pens marked with an asterisk (\*) also selected for preparation of validation samples.

**Table S2:** Correct vs. incorrect classifications of calibration data using a four-PC LDA model. The overall classification accuracy was 97.7 %.

| Pen No.      | Correct Classifications | Incorrect Classifications | % Correct   |
|--------------|-------------------------|---------------------------|-------------|
| 1            | 5                       | 0                         | 100         |
| 2            | 5                       | 0                         | 100         |
| 3            | 5                       | 0                         | 100         |
| 4            | 5                       | 0                         | 100         |
| 5            | 5                       | 0                         | 100         |
| 6            | 5                       | 0                         | 100         |
| 7            | 5                       | 0                         | 100         |
| 8            | 5                       | 0                         | 100         |
| 9            | 4                       | 1 (Predicted as Pen 18)   | 80          |
| 10           | 5                       | 0                         | 100         |
| 11           | 5                       | 0                         | 100         |
| 12           | 5                       | 0                         | 100         |
| 13           | 5                       | 0                         | 100         |
| 14           | 5                       | 0                         | 100         |
| 15           | 5                       | 0                         | 100         |
| 16           | 5                       | 0                         | 100         |
| 17           | 5                       | 0                         | 100         |
| 18           | 4                       | 1 (Predicted as Pen 9)    | 80          |
| 19           | 5                       | 0                         | 100         |
| 20           | 5                       | 0                         | 100         |
| 21           | 5                       | 0                         | 100         |
| 22           | 4                       | 1 (Predicted as Pen 30)   | 80          |
| 23           | 5                       | 0                         | 100         |
| 24           | 4                       | 1 (Predicted as Pen 7)    | 80          |
| 25           | 5                       | 0                         | 100         |
| 26           | 5                       | 0                         | 100         |
| 27           | 5                       | 0                         | 100         |
| 28           | 5                       | 0                         | 100         |
| 29           | 5                       | 0                         | 100         |
| 30           | 5                       | 0                         | 100         |
| 31           | 5                       | 0                         | 100         |
| 32           | 5                       | 0                         | 100         |
| 33           | 5                       | 0                         | 100         |
| 34           | 5                       | 0                         | 100         |
| 35           | 5                       | 0                         | 100         |
| <b>Total</b> | <b>171</b>              | <b>4</b>                  | <b>97.7</b> |

**Figure S1:** Photograph of ink sample prepared using parallel lines deposited onto white copy paper.

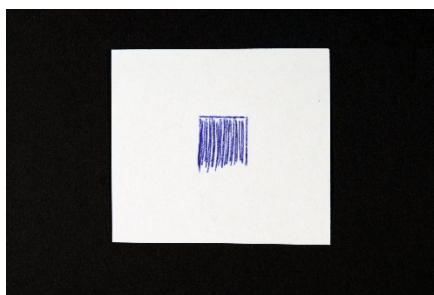

**Figure S2:** 3-dimensional PCA projection plot showing the distribution of fresh vs. aged inks following two months stored in the dark, open to air.

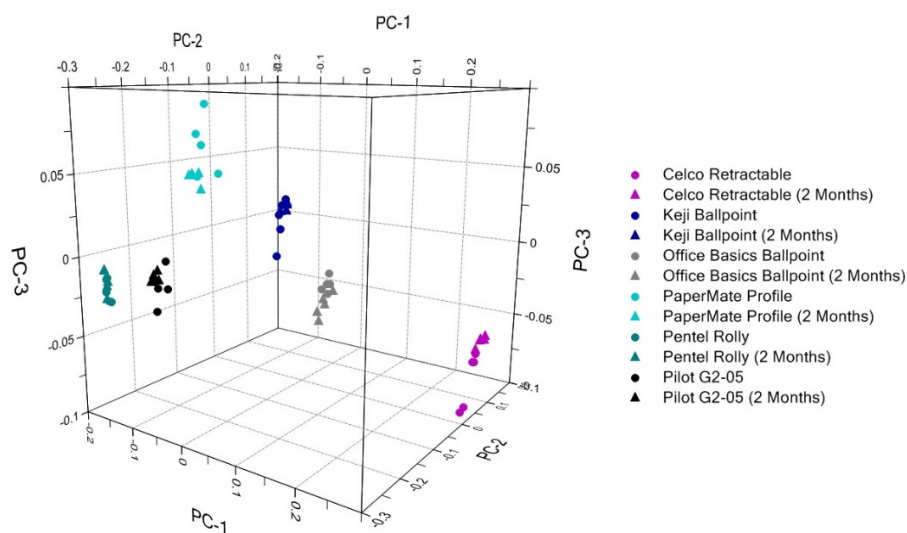

**Figure S3:** 3-dimensional PCA projection plot showing the distribution of fresh vs. aged inks following two months stored in the dark, sealed in plastic archive sheets.

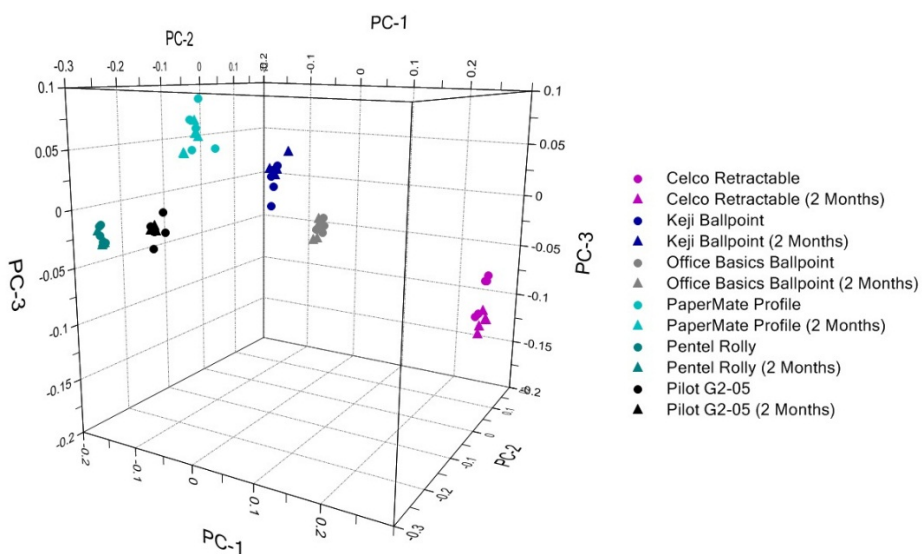

**Figure S4:** Factor loadings of the first three PCs for PCA conducted on the population of blue ballpoint pens.

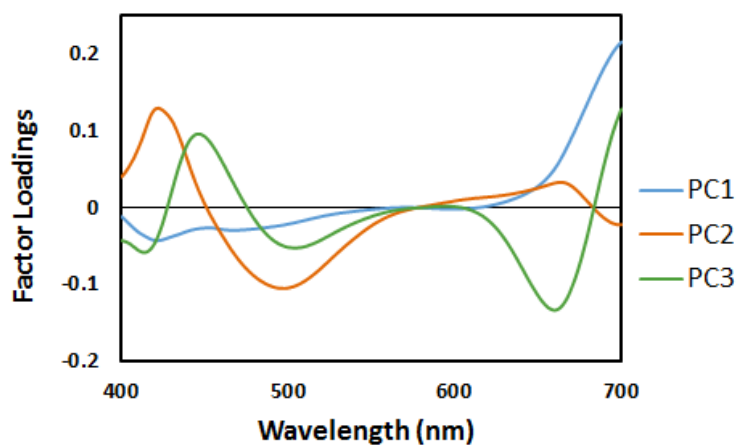

**Figure S5:** Normalised diffuse reflectance visible spectra obtained from PaperMate Profile ink on copy paper, both freshly deposited and following one week of natural ageing stored under open light.

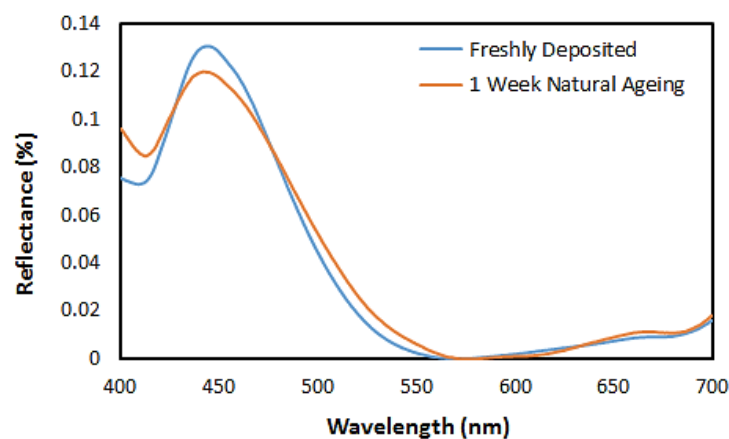

**Figure S6:** Normalised diffuse reflectance visible spectra obtained from PaperMate Profile ink on copy paper, both freshly deposited and following 24 hours of thermal ageing.

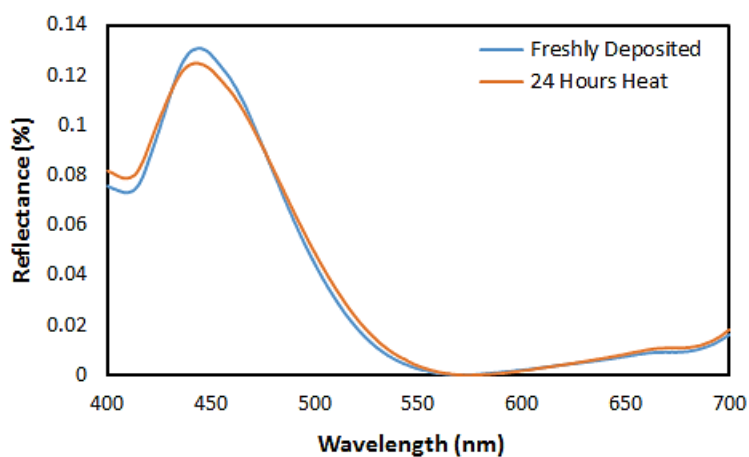

**Figure S7:** Normalised diffuse reflectance visible spectra obtained from PaperMate Profile ink on copy paper, both freshly deposited and following 24 hours of UV irradiation.

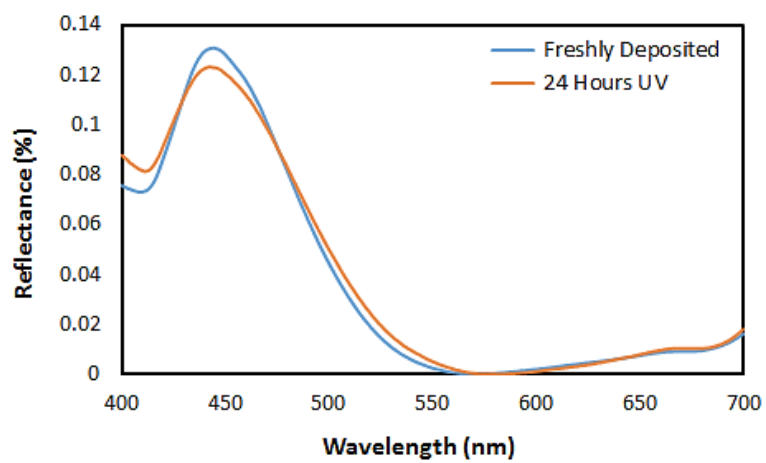

Supplement: c5ay00761e1.pdf [file c5ay00761e1.pdf]
